# Supplementary material
Source: MDPI journal article supplement (https://www.mdpi.com/2076-3417/10/23/8695)
Supplement: s1 [file s1]

## Attenuated Total Reflectance-Fourier Transform Infrared Spectroscopy (ATR-FTIR) Coupled with Chemometrics, to Control the Botanical Authenticity and Quality of Cold-Pressed Functional Oils Commercialized in Romania

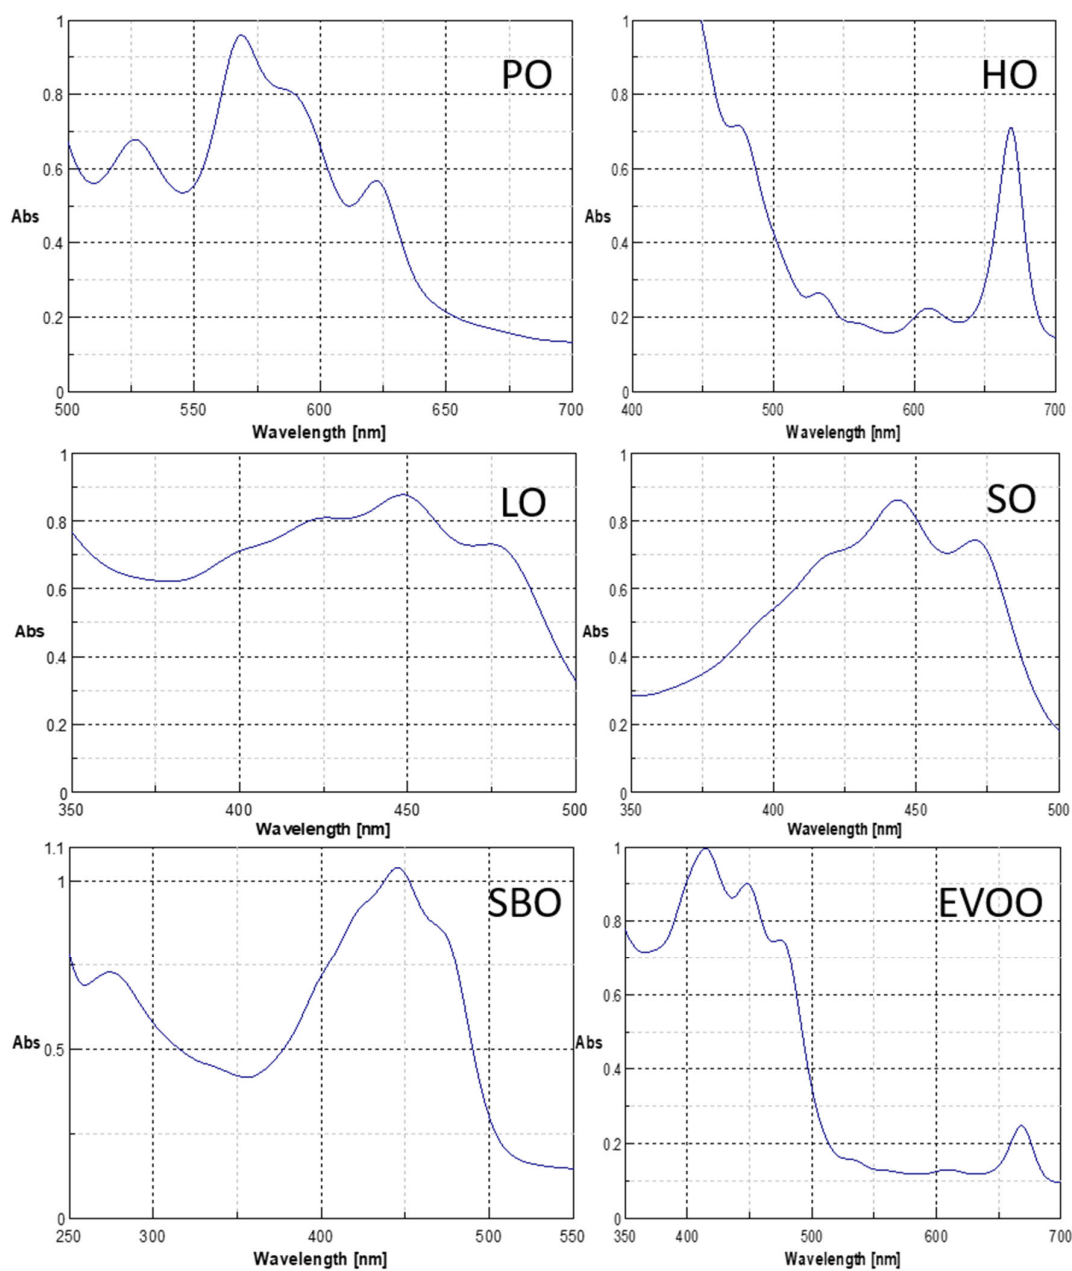

Figure S1.
